# Supplementary material for: 1H, 13C and 15N resonance assignments for the microtubule-binding domain of the kinetoplastid kinetochore protein KKT4 from Trypanosoma brucei
Source: Springer Nature journal article supplement (doi:10.1007/s12104-020-09968-1), 2020-07-21
Supplement: MOESM1 [file 12104_2020_9968_MOESM1_ESM.pdf]

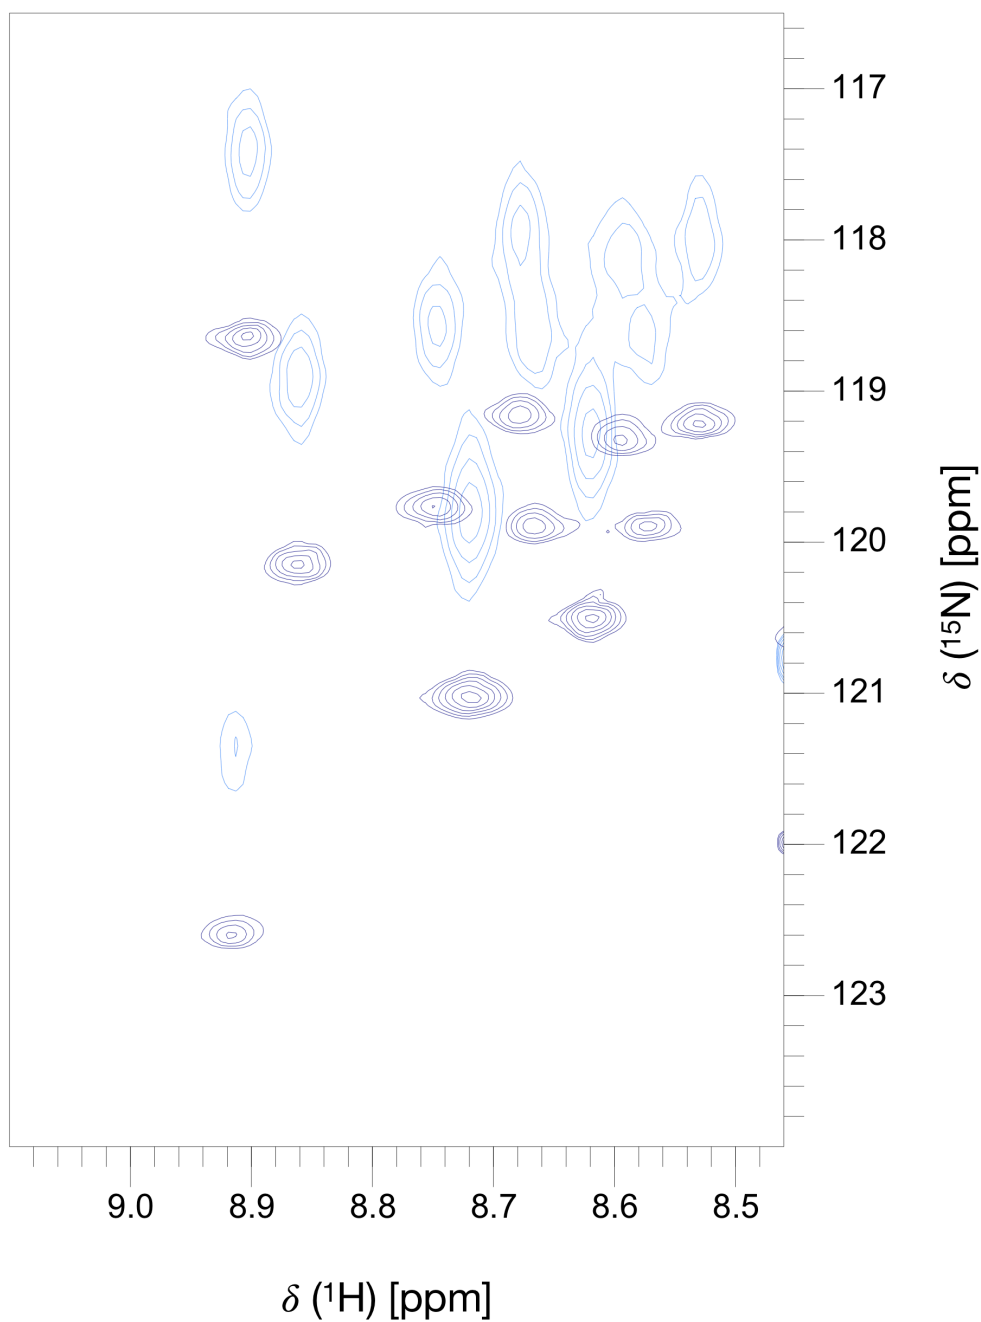

**Supplementary Figure 1: Comparison of 750 MHz  $^1\text{H}$ - $^{15}\text{N}$  BEST-TROSY and semi-BEST-TROSY spectra of KKT4 $^{145-232}$ .** A small region of the BEST-TROSY (dark blue) and semi-BEST-TROSY (light blue) spectra of KKT4 $^{145-232}$ , in 25 mM HEPES, 150mM NaCl and 0.5 mM TCEP (95%  $\text{H}_2\text{O}$ /5%  $\text{D}_2\text{O}$ ), at pH 7.2, 30 °C, are overlaid. Peaks in the two spectra are offset in the  $^{15}\text{N}$  dimension by the one-bond  $^1\text{H}^{\text{N}}\text{-}^{15}\text{N}$  coupling constant. Peaks in the BEST-TROSY spectrum show much narrower  $^{15}\text{N}$  linewidths than observed in the semi-BEST-TROSY spectrum indicating that under the conditions being studied, KKT4 $^{145-232}$  shows a significant ‘TROSY’ effect due to a long effective rotational correlation time.
