# Supplementary material for: 1H, 13C and 15N resonance assignments for the microtubule-binding domain of the kinetoplastid kinetochore protein KKT4 from Trypanosoma brucei
Source: Springer Nature journal article supplement (doi:10.1007/s12104-020-09968-1), 2020-07-21
Supplement: MOESM2 [file 12104_2020_9968_MOESM2_ESM.pdf]

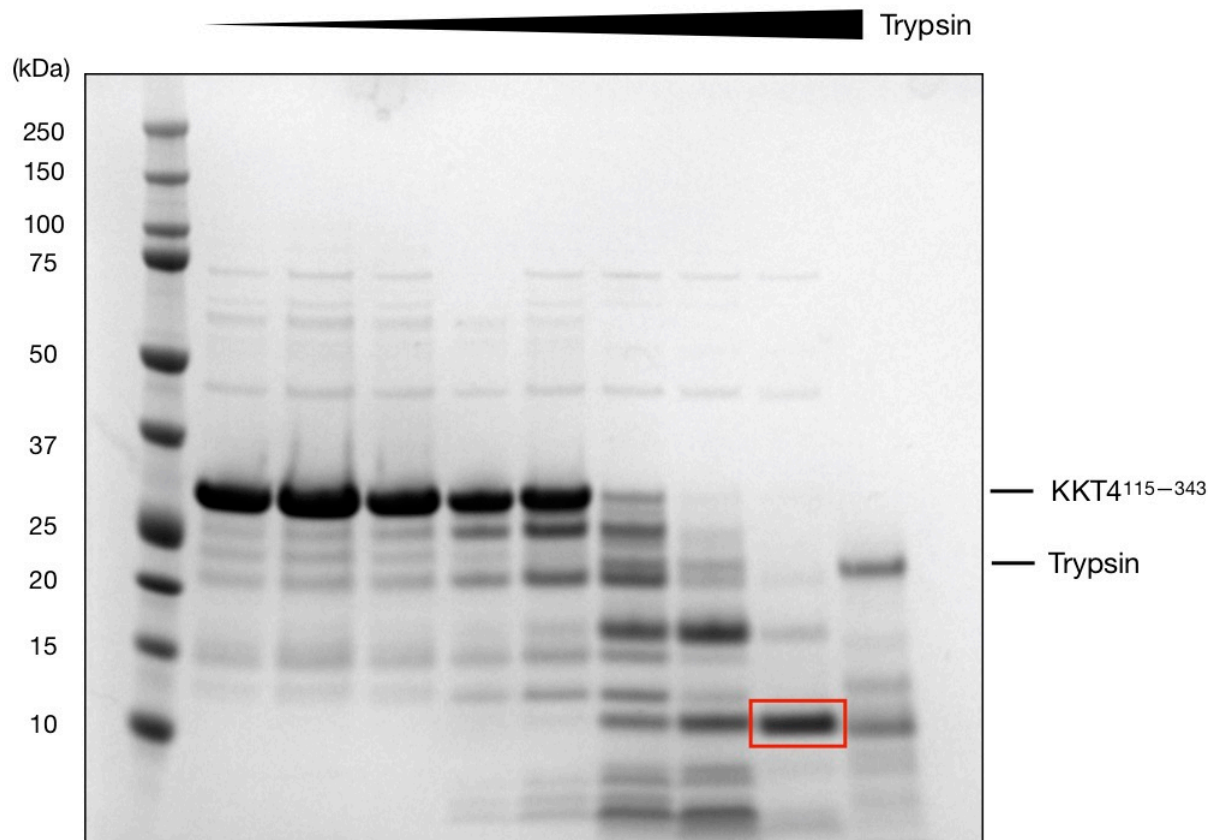

**Supplementary Figure 2: The *in vitro* limited proteolysis of KKT4<sup>115-343</sup>**

Samples containing 20 μg of KKT4<sup>115-343</sup> in 50 mM sodium phosphate pH 7.5, 200 mM NaCl and 0.5 mM TCEP were mixed with increasing amounts (0, 0.002, 0.004, 0.02, 0.04, 0.2, 0.4, 2 and 200 μg – lanes 2-10) of trypsin in 25 mM Tris pH 8.0, 2 mM CaCl<sub>2</sub> in a 1:1 v/v ratio. Following incubation on ice for 1 hour, samples were analysed using SDS-PAGE to assess the degree of proteolysis. The band highlighted in red, identified following incubation with 2 μg trypsin, was cut out and subjected to mass spectrometry analysis. This revealed that the trypsin-resistant fragment corresponds to residues 145–230 of KKT4 (KKT4<sup>145-230</sup>).
