# Supplementary material for: 1H, 13C and 15N resonance assignments for the microtubule-binding domain of the kinetoplastid kinetochore protein KKT4 from Trypanosoma brucei
Source: Springer Nature journal article supplement (doi:10.1007/s12104-020-09968-1), 2020-07-21
Supplement: MOESM3 [file 12104_2020_9968_MOESM3_ESM.pdf]

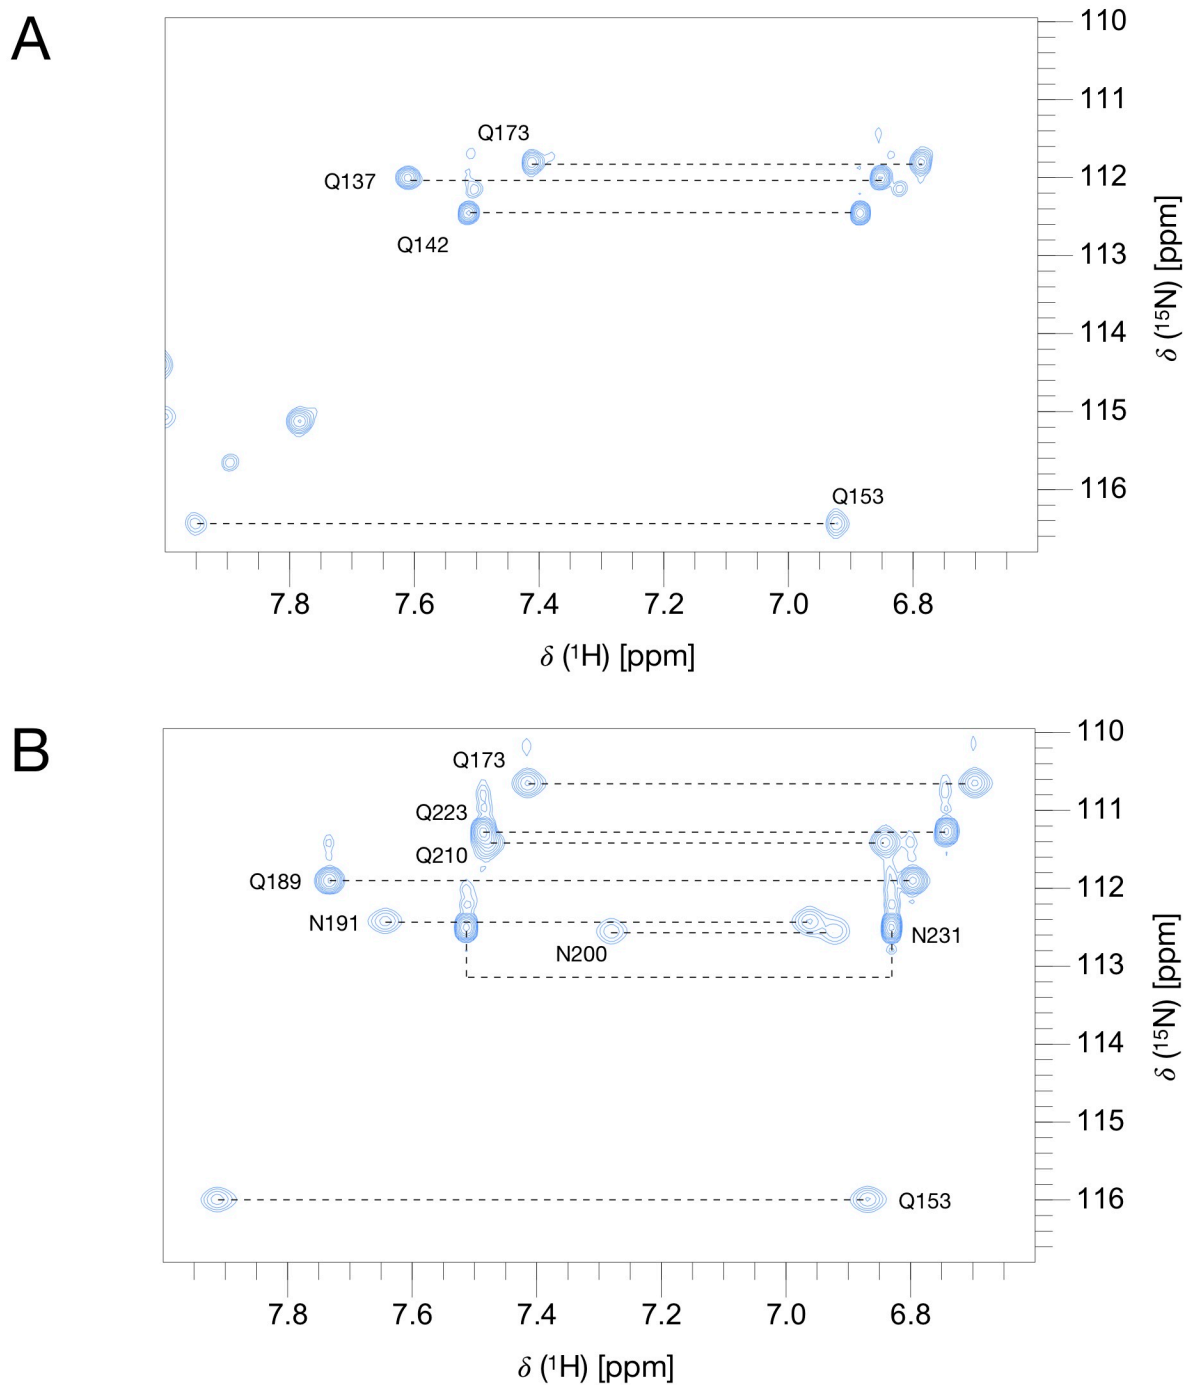

**Supplementary Figure 3: Expansion of  $^1\text{H}$ - $^{15}\text{N}$  HSQC spectra showing side chain asparagine and glutamine  $\text{NH}_2$  assignments.** (A) HSQC spectrum of KKT4<sup>115-174</sup> in 25 mM HEPES, 150mM NaCl and 0.5 mM TCEP (95%  $\text{H}_2\text{O}$ /5%  $\text{D}_2\text{O}$ ), at pH 7.2, 20 °C. Peak assignments for the four Gln side chain  $\text{NH}_2$  are annotated. (B) HSQC spectrum of KKT4<sup>145-232</sup> in 25 mM HEPES, 150mM NaCl and 0.5 mM TCEP (95%  $\text{H}_2\text{O}$ /5%  $\text{D}_2\text{O}$ ), at pH 7.2, 30 °C. Peak assignments for the two Asn and five Gln side chain  $\text{NH}_2$  are annotated.
