# Supplementary material for: 1H, 13C and 15N resonance assignments for the microtubule-binding domain of the kinetoplastid kinetochore protein KKT4 from Trypanosoma brucei
Source: Springer Nature journal article supplement (doi:10.1007/s12104-020-09968-1), 2020-07-21
Supplement: MOESM4 [file 12104_2020_9968_MOESM4_ESM.pdf]

### Supplementary Table 1

$^{13}\text{C}'(\text{i}-1)$  and  $^{15}\text{N}(\text{i})$  chemical shifts for Xxx-Pro motifs in KKT4<sup>115-343</sup>

| <b>Residue Pair</b> | <b><math>^{13}\text{C}'(\text{i}-1)</math> (ppm)</b> | <b><math>^{15}\text{N}(\text{Pro}(\text{i}))</math> (ppm)</b> |
|---------------------|------------------------------------------------------|---------------------------------------------------------------|
| Q253-P254           | 174.0                                                | 137.1                                                         |
| G273-P274           | 172.0                                                | 133.9                                                         |
| Q276-P277           | 173.9                                                | 136.8                                                         |
| L280-P281           | 175.1                                                | 135.7                                                         |
| H282-P283           | 174.0                                                | 138.2                                                         |
| A299-P300           | 175.3                                                | 135.8                                                         |
| T320-P321           | 172.8                                                | 139.3                                                         |
| R323-P324           | 173.9                                                | 136.8                                                         |
| N329-P330           | -                                                    | 136.6                                                         |
| T332-P333           | 172.8                                                | 139.0                                                         |
